# Supplementary material for: Rhombohedral trap for studying molecular oligomerization in membranes: application to daptomycin
Source: Royal Society of Chemistry journal article supplement (doi:10.1039/c9sm00323a), 2019-01-01

## Supplemental Information

### Rhombohedral Trap for Studying Molecular Oligomerization in Membranes: Application to Daptomycin

Ming-Tao Lee<sup>1,2</sup>, Wei-Chin Hung<sup>3</sup> and Huey W. Huang<sup>\*4</sup>

Fig S1. Grazing angle diffraction patterns of the lamellar (L), rhombohedral (R) and hexagonal (H) phases (reproduced from ref 36 for convenience).

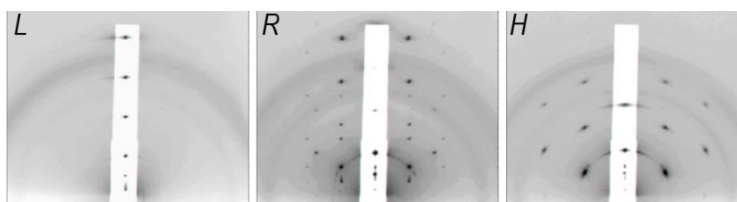

Fig S2 Structural formula of daptomycin with CPK<sup>TM</sup> space filling atomic models. Two sides of the CPK model of daptomycin are shown along with lipid DOPG. Their sizes are in proportion to each other (reproduced from ref. 26).

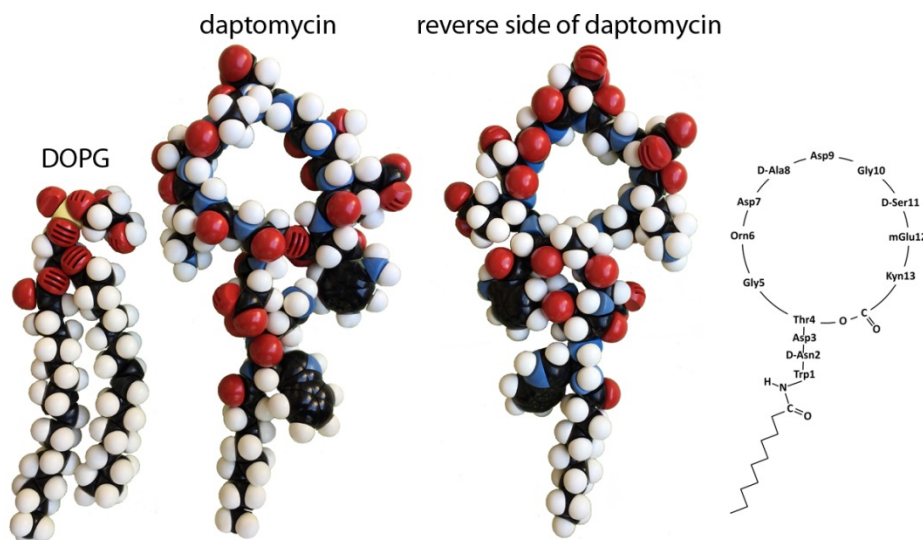

Fig. S3 CD spectra of daptomycin in different daptomycin/Ca<sup>2+</sup>/PG compositions. Shown here are the CD spectra of 40  $\mu\text{M}$  daptomycin with 800  $\mu\text{M}$  7:3 DOPC/DOPG in 10 mM Tris buffer at pH 7.4 with Ca<sup>2+</sup> concentrations between 0 and 103  $\mu\text{M}$ . Each spectrum can be fit by a linear combination (dotted line) of two basis spectra A and B, with the percentage of B indicated. A is the CD with no Ca<sup>2+</sup>; B is the CD with 97  $\mu\text{M}$  CaCl<sub>2</sub>. (Reproduced from ref. 26, Fig. 3)

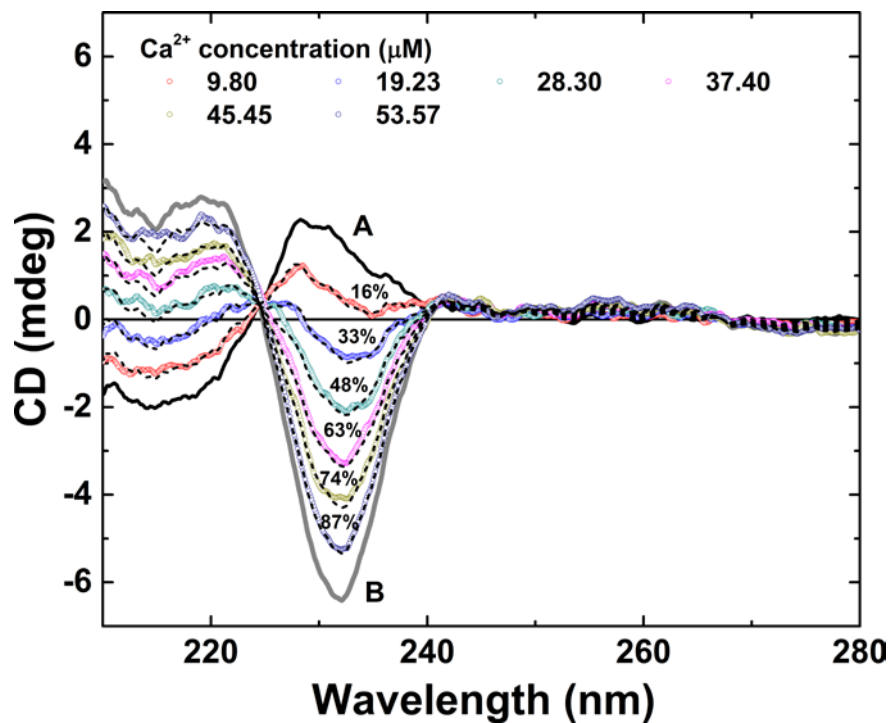

Supplement: c9sm00323a1.pdf [file c9sm00323a1.pdf]
